# Supplementary material for: Substantial SF-36 score differences according to the mode of administration of the questionnaire: an ancillary study of the SENTIPAT multicenter randomized controlled trial comparing web-based questionnaire self-completion and telephone interview
Source: bioRxiv or medRxiv preprint supplement (doi:10.1101/2021.02.08.21251357), 2021-02-11
Supplement: Supplementary file [file media-1.pdf]

## Supplemental Table to:

### Substantial SF-36 score differences according to the mode of administration of the questionnaire: an ancillary study of the SENTIPAT multicenter randomized controlled trial comparing web-based questionnaire self-completion and telephone interview

Ayşe Açma<sup>1</sup>, Fabrice Carrat<sup>2</sup>, and Gilles Hejblum<sup>1§</sup>; for the SENTIPAT study group

<sup>1</sup>Sorbonne Université, INSERM, Institut Pierre Louis d'Épidémiologie et de Santé Publique, F75012, Paris, France

<sup>2</sup>Sorbonne Université, INSERM, Institut Pierre Louis d'Épidémiologie et de Santé Publique, AP-HP, Hôpital Saint-Antoine, Unité de Santé Publique, F75012, Paris, France

<sup>§</sup>Corresponding author: [gilles.hejblum@inserm.fr](mailto:gilles.hejblum@inserm.fr)

#### Supplemental Table: Internal reliability of SF-36 in the Internet and Telephone group.

| SF-36 Scale              | Cronbach's alpha [95% confidence interval] |                     |
|--------------------------|--------------------------------------------|---------------------|
|                          | Internet group                             | Telephone T         |
| PF, physical functioning | 0.919 [0.903–0.933]                        | 0.898 [0.885–0.909] |
| RP, role-physical        | 0.861 [0.830–0.887]                        | 0.931 [0.922–0.939] |
| BP, bodily pain          | 0.906 [0.879–0.927]                        | 0.933 [0.921–0.943] |
| GH, general health       | 0.797 [0.754–0.835]                        | 0.717 [0.681–0.751] |
| VT, vitality             | 0.852 [0.819–0.880]                        | 0.714 [0.677–0.750] |
| SF, social functioning   | 0.879 [0.845–0.906]                        | 0.943 [0.933–0.951] |
| RE, role-emotional       | 0.791 [0.741–0.832]                        | 0.954 [0.947–0.960] |
| MH, mental health        | 0.916 [0.898–0.932]                        | 0.888 [0.874–0.901] |
